# Supplementary material for: Efficient delivery of gene editors using intein-engineered virus-like particles
Source: Research Square preprint supplement (doi:10.21203/rs.3.rs-8719484/v1), 2026-02-17
Supplement: Supplementary file 1 [file 3e67d50742335a7de3a742e9.docx]

| Reagent or resource | Source | Identifier | Dilution |
| --- | --- | --- | --- |
| Primary antibody for IHC | | | |
| Rabbit anti-GFP | Abcam | Cat#: ab290 | 1:200 |
| Secondary antibody for IHC | | | |
| Alexa Flour 488 goat anti-Rabbit | Thermo Fisher Scientific | Cat#: A-11008 | 1:400 |

| Reagent or resource | Source | Identifier | Dilution |
| --- | --- | --- | --- |
| Primary antibodies for WB | | | |
| Rabbit anti-TSG101 | Thermo Fisher Scientific | Cat#: PA5-82236 | 1:1000 |
| Rabbit anti-Cre | Abcam | Cat#: ab188568 | 1:1000 |
| Rabbit anti-Syntenin-1 | Thermo Fisher Scientific | Cat#: 600-401-379-RTU | 1:1000 |
| Goat anti-VSV-G | Thermo Fisher Scientific | Cat#: PA1-30278 | 1:1000 |
| Mouse anti-Cas9 | Abcam | Cat#: ab191468 | 1:1000 |
| Goat anti-Calnexin | Thermo Fisher Scientific | Cat#: MCA497G | 1:1000 |
| Mouse anti-β-Actin | Sigma | Cat#: A5441 | 1:20000 |
| Secondary antibodies for WB | | | |
| IRDye® 800CW Donkey anti-Goat IgG | LI-COR Biosciences | Cat#: 926-32214 | 1:10000 |
| IRDye® 800CW Goat anti-Mouse IgG | LI-COR Biosciences | Cat#: 926-32210 | 1:10000 |
| IRDye® 800CW Goat anti-Rabbit IgG | LI-COR Biosciences | Cat#: 926-32211 | 1:10000 |
| IRDye® 680RD Goat anti-Mouse IgG | LI-COR Biosciences | Cat#: 926-68070 | 1:10000 |
| IRDye® 800CW Donkey anti-Goat IgG | LI-COR Biosciences | Cat#: 926-32214 | 1:10000 |
